# Supplementary material for: BdNub Is Essential for Maintaining gut Immunity and Microbiome Homeostasis in Bactrocera dorsalis
Source: MDPI journal article supplement (doi:10.3390/insects14020178), 2023-02-10
Supplement: s1 [file s1]

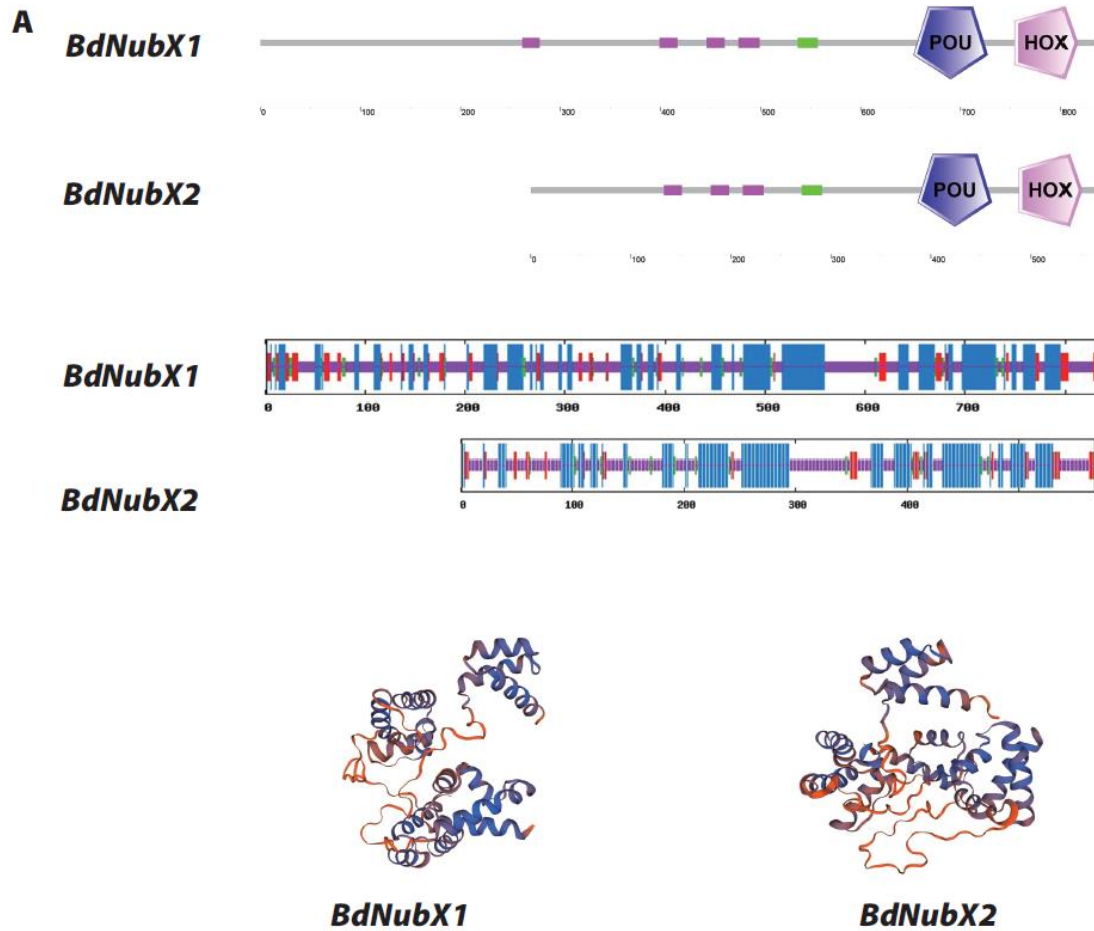

**FigureS1.** Protein functional domain analysis of *BdNubX1* and *BdNubX2*. A: From top to bottom, Protein function domain analysis of *BdNubX1* and *BdNubX2*. Prediction the of secondary structure of *BdNubX1* and *BdNubX2*. Prediction of the tertiary structure of *BdNubX1* and *BdNubX2*
